# Supplementary material for: Organic cation transporter 3 mediates cisplatin and copper cross-resistance in hepatoma cells
Source: PubMed Central journal article supplement (PMC5787505; doi:10.18632/oncotarget.23142), 2017-12-12
Supplement: oncotarget-09-743-s001.pdf [file oncotarget-09-743-s001.pdf]

## Organic cation transporter 3 mediates cisplatin and copper cross-resistance in hepatoma cells

### SUPPLEMENTARY MATERIALS

**Supplementary Table 1: Cell survival of ATP7B KO cells after long-term cisplatin exposure**

| Experiment | 0.1 $\mu$ M | 1 $\mu$ M | 5 $\mu$ M |
|------------|-------------|-----------|-----------|
| 1          | >23 d       | 9 d       | 7 d       |
| 2          | >23 d       | 9 d       | 7 d       |
| 3          | >23 d       | 21 d      | ND*       |

\*ND, not done

**Supplementary Table 2: Primers used for RT-qPCR analysis**

| Gene Symbol | Synonym                                                  | Accession Number | Forward/Reverse (5'–3')                           |
|-------------|----------------------------------------------------------|------------------|---------------------------------------------------|
| ATP7A       | ATPase, Cu <sup>++</sup> transporting, alpha polypeptide | NM_000052        | AGCAATGGCTGCTTCATCTG/<br>GCAGGCAGTTCATAACTCTCG    |
| CP          | Ceruloplasmin                                            | NM_000096        | CACGGCCATAGCTTCCAATAC/<br>CCAAATTCAGGTGTTCTTGG    |
| CTR1        | Copper transporter 1                                     | NM_001859        | GTCCCAGGACCAAATGGAAC/<br>ACCACCTGGATGATGTGCAG     |
| CTR2        | Copper transporter 2                                     | NM_001860        | TGCAGGCTCAGATTCATTCC/<br>TGACCACCTGGATGACATGG     |
| DMT1        | Divalent metal transporter 1                             | NM_001174127     | GGGTTGGCAATGTTTGATTG/<br>GCGTCCATGGTGTTCAGAAG     |
| GAPDH       | Glyceraldehyde-3-phosphate dehydrogenase                 | NM_002046        | CCCCTCCTCCACCTTTGAC/<br>CCACCACCCTGTTGCTGTAG      |
| GST         | Glutathione S-Transferase                                | NM_000561        | CCGTATATTTGAGCCCAAGTGC/<br>GCTTTGAGGGCTTGGAGAAGA  |
| HPRT        | hypoxanthine phosphoribosyltransferase 1                 | NM_000194        | TTATGCTGAGGATTTGGAAAGG/<br>CCATCTCCTTCATCACATCTCG |
| MATE1       | Multidrug and toxin extrusion member 1                   | NM_018242        | AAGCTGGAGCTGGATGCAGTC/<br>CAGCAGAGGAGCAGGACGAGC   |
| MATE2       | Multidrug And Toxin Extrusion1                           | NM_001099646     | GGAAGCTTGCTGCAGAGGAG/<br>GAGCACTGCAACCAGACCTG     |
| MDR1        | Multi Drug Resistance Protein 1                          | NM_000927        | TCGTGCCCTTGTTAGACAGC/<br>CCAAGAAGCCCTGGACAAAG     |
| MRP1        | Multidrug Resistance Associated Protein 1                | NM_004996        | ACTGCACCGTCCTCACCATC/<br>GGAGAAATCCAGGAGTACGGC    |
| MRP2        | ATP Binding Cassette Subfamily C Member 2                | NM_000392        | CGAAGTGACAGAGGCTGGTG/<br>GCTCTGCTTCGGAAATCCAA     |
| MT1         | Metallothionein 1                                        | NM_005952        | CTCCTTGCCCTCGAAATGGAC/<br>GCATTTGCACTCTTTGCATTTG  |

|       |                                 |              |                                                      |
|-------|---------------------------------|--------------|------------------------------------------------------|
| OCT1  | Organic cation transporter 1    | NM_001198783 | CATCATAATCATGTGTGTTGGCC/<br>CAAACAAAATGAGGGGCAAGGCTT |
| OCT2  | Organic cation transporter 2    | NM_003058    | TTCCTGGTCTACCGGCTCAC/<br>CAACAGCACCAGACCTCCAG        |
| OCT3  | Organic cation transporter 3    | NM_001173531 | GACAAGAGAAGCCCCAACCTGAT/<br>CACTAAAGGAGAGCCAAAATGTC  |
| OCTN1 | Organic carnitine transporter 1 | AB007448     | GTGCTGTGTGTCCCGCTGTG/<br>CGAGTCCTGAACAGGTCCAG        |
| OCTN2 | Organic carnitine transporter 2 | AB015050     | CATGCAGACAGGCTTCAGCTTC/<br>ATGCACACTCCTAACGTAGAG     |

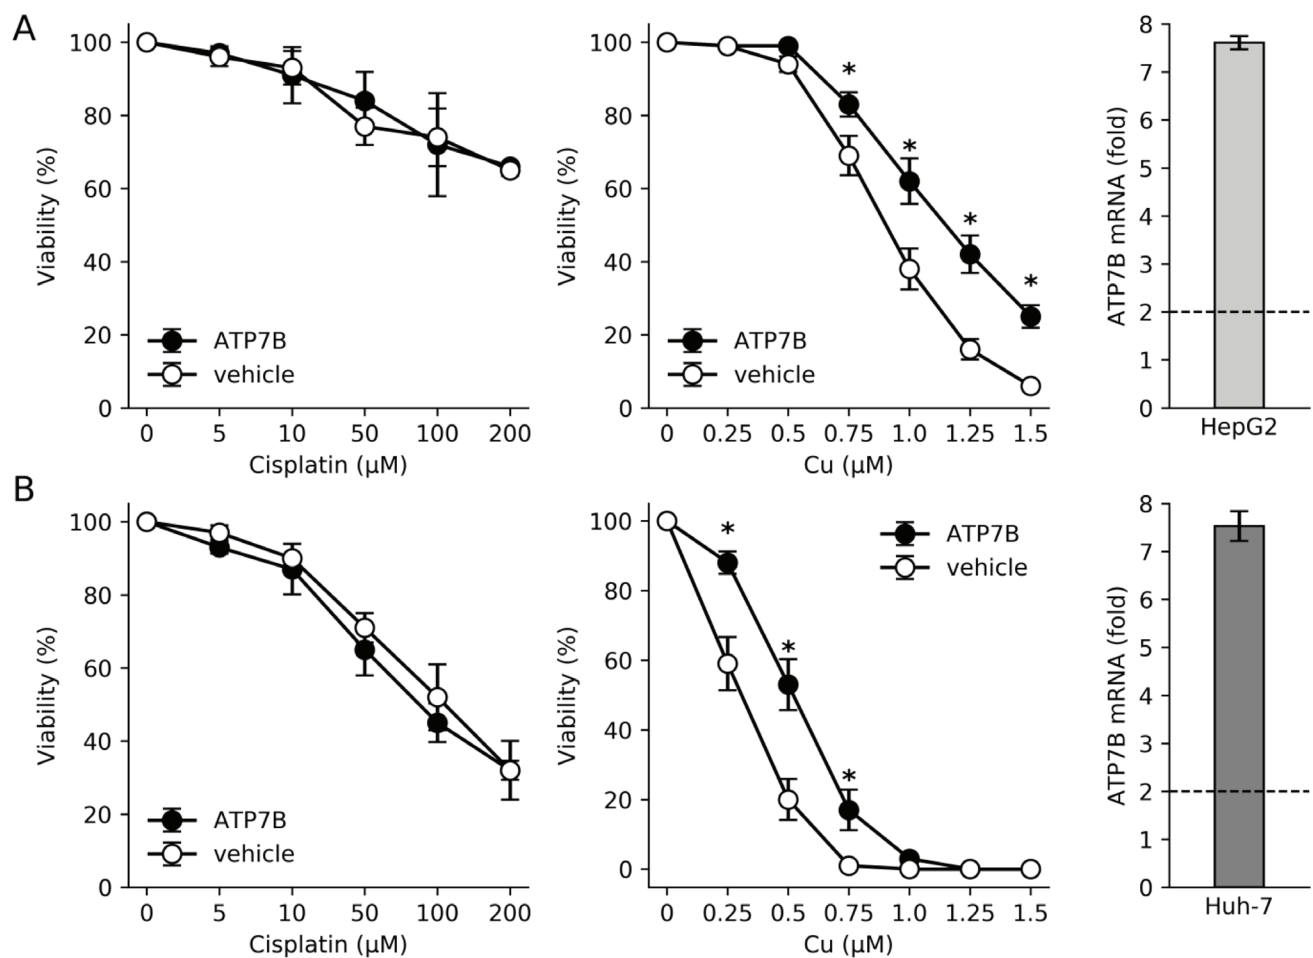

**Supplementary Figure 1: Overexpression of ATP7B does not confer resistance to cisplatin in hepatoma cell lines.** Cell viability of HepG2 cells (A) and Huh-7 cells (B) transduced with empty (white) or retroviral ATP7B expression vector (black) was determined. Mean/SE are given ( $n = 5$ ) (left graphs). ATP7B mRNA expression relative to empty vector transduced cells is shown. Mean/SE are given ( $n = 3$ ) (right bar). \* $P < 0.05$ .

A

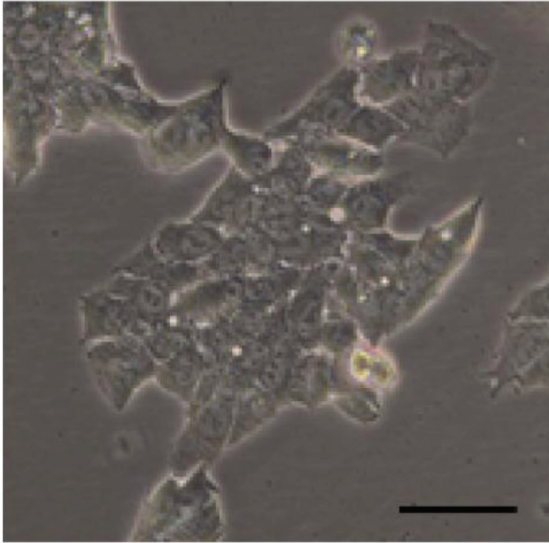

HepG2

B

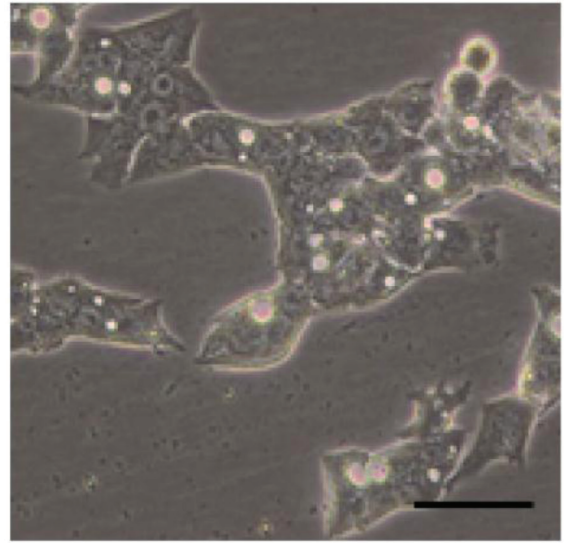

KO

**Supplementary Figure 2: Cell morphology of HepG2 and ATP7B KO.** Light microscopic image of HepG2 (A) and ATP7B KO (B) cells for comparison. Scale bar, 50  $\mu$ m.

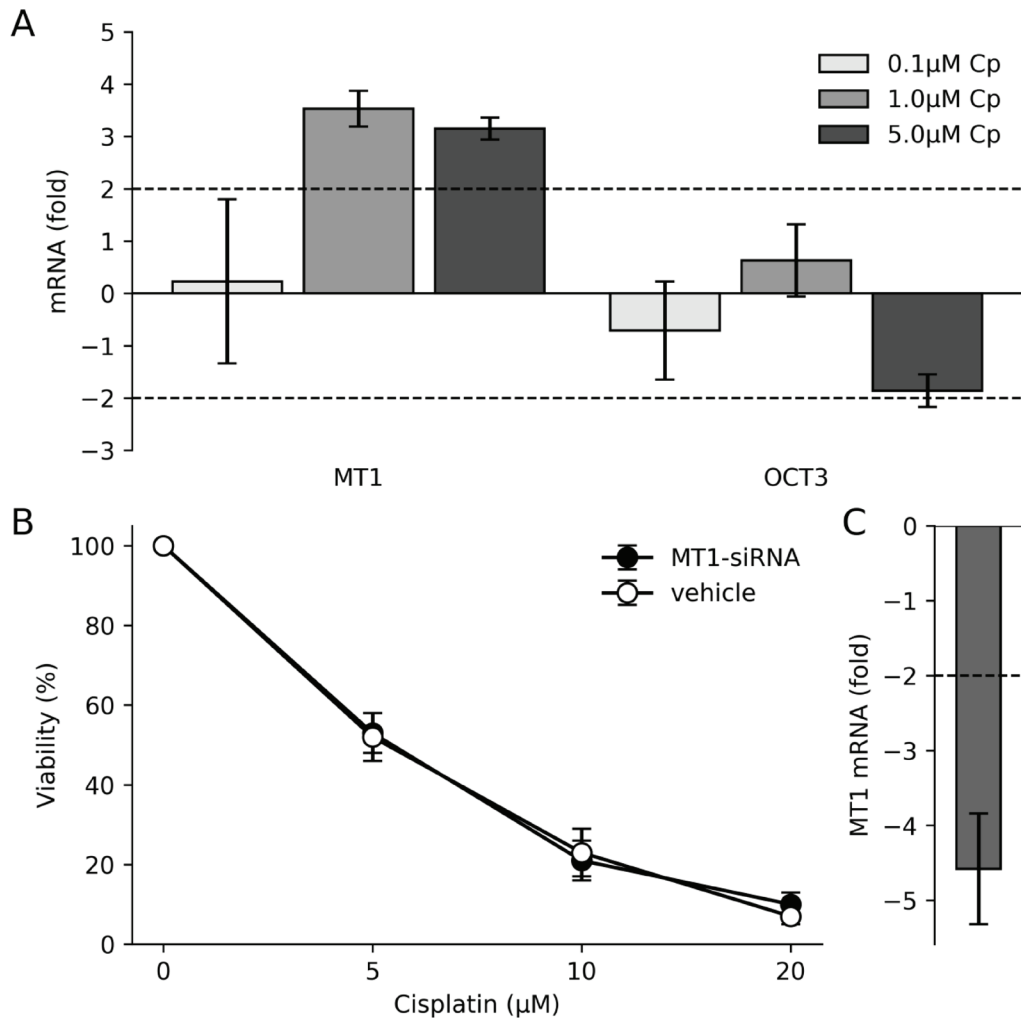

**Supplementary Figure 3: Knockdown of MT1 does not affect cisplatin resistance.** (A) mRNA expression of ATP7B KO cells after 72 h exposure to 0.1 (light grey), 1.0 (grey) and 5.0 μM (dark grey) cisplatin. Expression is shown relative to untreated cells. Mean/SE are given ( $n = 3$ ). (B) Cell viability of ATP7B KO cells treated with MT1-specific siRNA (black) or vehicle (white). Mean/SE are given ( $n = 3$ ). (C) mRNA expression of ATP7B KO cells after treatment with MT1-specific siRNA. Mean/SE are given ( $n = 3$ ).

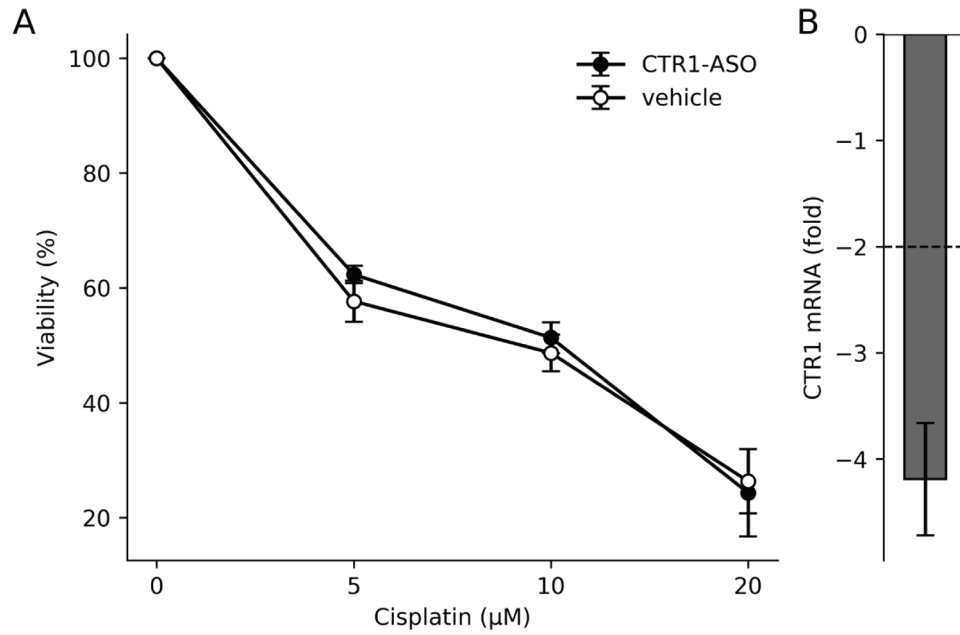

**Supplementary Figure 4: Downregulation of CTR1 does not affect cisplatin sensitivity.** (A) Cell viability of ATP7B KO cells transfected with scrambled oligonucleotide (white) or CTR1-antisense oligonucleotide (ASO) (black). Mean/SE are given ( $n = 3$ ). (B) RT-qPCR analysis of ATP7B KO cells after CTR1-ASO treatment. Mean/SE are given ( $n = 3$ ).

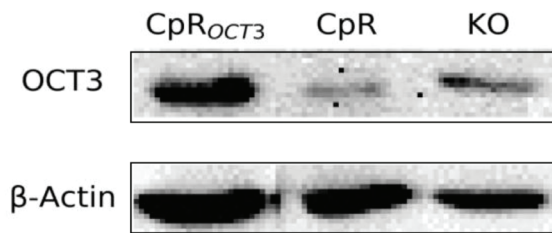

**Supplementary Figure 5: Protein expression of OCT3.** Western blot of OCT3 expression in CpR<sub>OCT3</sub>, CpR and ATP7B KO cells. β-Actin was used for internal control. One typical experiment is shown ( $n = 3$ ).

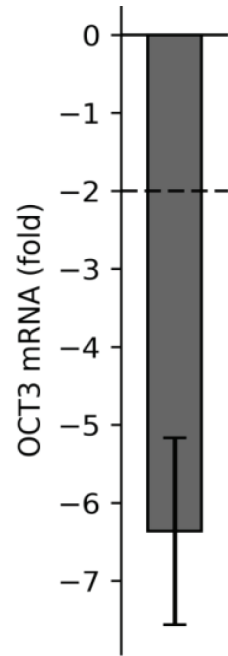

**Supplementary Figure 6: OCT3 is downregulated after siRNA treatment.** RT-qPCR analysis of ATP7B KO cells mRNA after OCT3 siRNA treatment. Mean/SE are given ( $n = 6$ ).
